# Supplementary material for: Ultrasensitive sorption behavior of isostructural lanthanide–organic frameworks induced by lanthanide contraction
Source: Royal Society of Chemistry journal article supplement (doi:10.1039/c2jm33884j), 2012-01-01
Supplement: c2jm33884j.pdf [file c2jm33884j.pdf]

# **Ultrasensitive Sorption Behavior of Isostructural Lanthanide-Organic Frameworks Induced by Lanthanide Contraction**

Zhongjun Lin <sup>a</sup>, Ruqiang Zou <sup>a,\*</sup>, Wei Xia <sup>a</sup>, Liangjie Chen <sup>a</sup>, Xidong Wang <sup>a</sup>, Fuhui Liao <sup>b</sup>, Yingxia Wang <sup>b</sup>, Jianhua Lin <sup>b</sup>, Anthony K. Burrell <sup>c</sup>

<sup>a</sup> *College of Engineering, Peking University, Beijing 100871, China. E-mail: rzou@pku.edu.cn.* <sup>b</sup> *College of Chemistry and Molecule Engineering, Peking University, Beijing 100871, China.* <sup>c</sup> *Chemical Sciences and Engineering Division, Argonne National Laboratory, 9700 S. Cass Avenue, Argonne, IL 60439.*

**Table S1.** Crystallographic Data and Structural Refinement Summary for **Pr-LOF**.

|                                              |                                                                  |
|----------------------------------------------|------------------------------------------------------------------|
| Formula                                      | PrC <sub>33</sub> H <sub>33</sub> N <sub>2</sub> O <sub>10</sub> |
| Molecular weight                             | 758.52                                                           |
| T (K)                                        | 293(2)                                                           |
| Crystal system                               | hexagonal                                                        |
| space group                                  | <i>P</i> 6 <sub>1</sub> 22                                       |
| <i>a</i> (Å)                                 | 16.4393(3)                                                       |
| <i>b</i> (Å)                                 | 16.4393(3)                                                       |
| <i>c</i> (Å)                                 | 23.7770(9)                                                       |
| Volume (Å <sup>3</sup> )                     | 5564.9(3)                                                        |
| $\alpha$ (deg)                               | 90                                                               |
| $\beta$ (deg)                                | 90                                                               |
| $\gamma$ (deg)                               | 120                                                              |
| <i>Z</i>                                     | 6                                                                |
| $\rho$ (g/m <sup>3</sup> )                   | 1.32559                                                          |
| R1, wR2 [ <i>I</i> >2 $\sigma$ ( <i>I</i> )] | 0.0486, 0.1455                                                   |

---

$R_1 = \frac{\sum ||F_o| - |F_c||}{\sum |F_o|}$ .  $wR_2 = [\frac{\sum w(F_o^2 - F_c^2)^2}{\sum w(F_o^2)^2}]^{1/2}$ .

**Table S2.** Selected bond lengths (Å) and angles (°) of complex **Pr-LOF**.

|                     |            |                     |            |
|---------------------|------------|---------------------|------------|
| Pr(1)-O(3)#1        | 2.371(5)   | Pr(1)-O(2)#5        | 2.505(6)   |
| Pr(1)-O(3)#2        | 2.371(5)   | Pr(1)-O(1W)         | 2.478(9)   |
| Pr(1)-O(2)#3        | 2.468(5)   | Pr(1)-O(1)          | 2.707(5)   |
| Pr(1)-O(2)#4        | 2.468(5)   | Pr(1)-O(2)          | 2.505(6)   |
| Pr(1)-O(1)#5        | 2.707(5)   |                     |            |
| O(3)#1-Pr(1)-O(3)#2 | 76.5(3)    | O(1)#4-Pr(1)-O(2)   | 95.5(3)    |
| O(3)#1-Pr(1)-O(1)#3 | 136.1(2)   | O(1W)-Pr(1)-O(2)    | 74.43(17)  |
| O(3)#2-Pr(1)-O(1)#3 | 72.92(19)  | O(2)#5-Pr(1)-O(2)   | 148.9(3)   |
| O(3)#1-Pr(1)-O(1)#4 | 72.92(19)  | O(3)#1-Pr(1)-O(1)#5 | 74.65(17)  |
| O(3)#2-Pr(1)-O(1)#4 | 136.1(2)   | O(3)#2-Pr(1)-O(1)#5 | 79.65(18)  |
| O(1)#3-Pr(1)-O(1)#4 | 148.5(2)   | O(1)#3-Pr(1)-O(1)#5 | 69.46(19)  |
| O(3)#1-Pr(1)-O(1W)  | 141.74(16) | O(1)#4-Pr(1)-O(1)#5 | 120.30(16) |
| O(3)#2-Pr(1)-O(1W)  | 141.74(17) | O(1W)-Pr(1)-O(1)#5  | 106.43(12) |
| O(1)#3-Pr(1)-O(1W)  | 74.24(12)  | O(2)#5-Pr(1)-O(1)#5 | 49.38(19)  |
| O(1)#4-Pr(1)-O(1W)  | 74.24(12)  | O(2)-Pr(1)-O(1)#5   | 143.4(3)   |
| O(3)#1-Pr(1)-O(2)#5 | 79.0(3)    | O(3)#1-Pr(1)-O(1)   | 79.65(18)  |
| O(3)#2-Pr(1)-O(2)#5 | 127.7(2)   | O(3)#2-Pr(1)-O(1)   | 74.65(17)  |
| O(1)#3-Pr(1)-O(2)#5 | 95.5(3)    | O(1)#3-Pr(1)-O(1)   | 120.30(16) |
| O(1)#4-Pr(1)-O(2)#5 | 76.0(2)    | O(1)#4-Pr(1)-O(1)   | 69.46(19)  |
| O(1W)-Pr(1)-O(2)#5  | 74.43(17)  | O(1W)-Pr(1)-O(1)    | 106.43(12) |
| O(3)#1-Pr(1)-O(2)   | 127.7(2)   | O(2)#5-Pr(1)-O(1)   | 143.4(3)   |
| O(3)#2-Pr(1)-O(2)   | 79.0(3)    | O(2)-Pr(1)-O(1)     | 49.38(19)  |
| O(1)#3-Pr(1)-O(2)   | 76.0(2)    | O(1)#5-Pr(1)-O(1)   | 147.1(2)   |

<sup>a</sup> Symmetry transformations used to generate equivalent atoms: #1  $x+1, y+1, z$ ; #2  $x-y+1, -y+1, -z$ ; #3  $y, -x+y+1, z-1/6$ ; #4  $x, x-y+1, -z+1/6$ ; #5  $x-y+1, -y+2, -z$ ; #6  $x, x-y, -z+1/6$ ; #7  $x-y+1, x, z+1/6$ ; #8  $x-1, y-1, z$ .

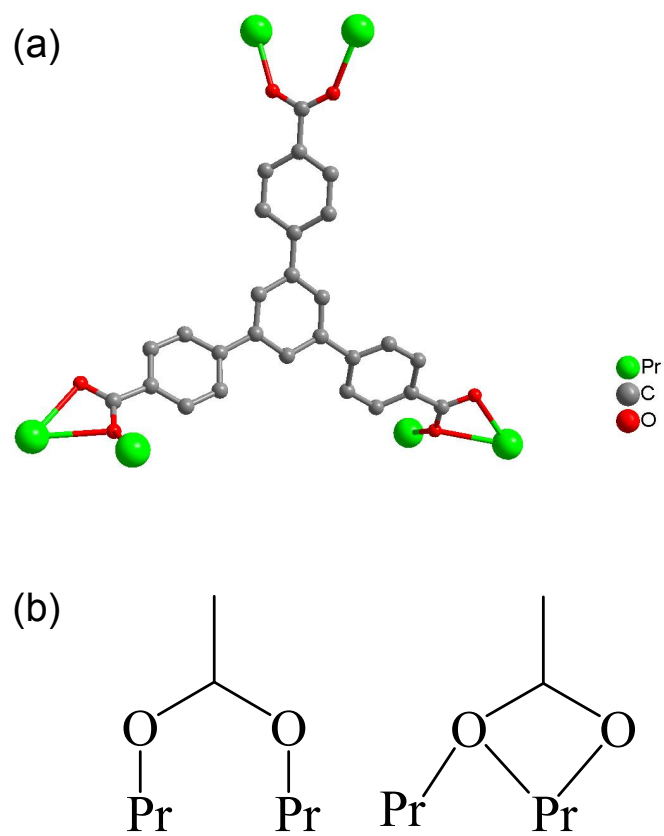

**Figure S1.** (a) The coordination environment of BTB ligand. (b) The two types of binding modes of BTB ligand.

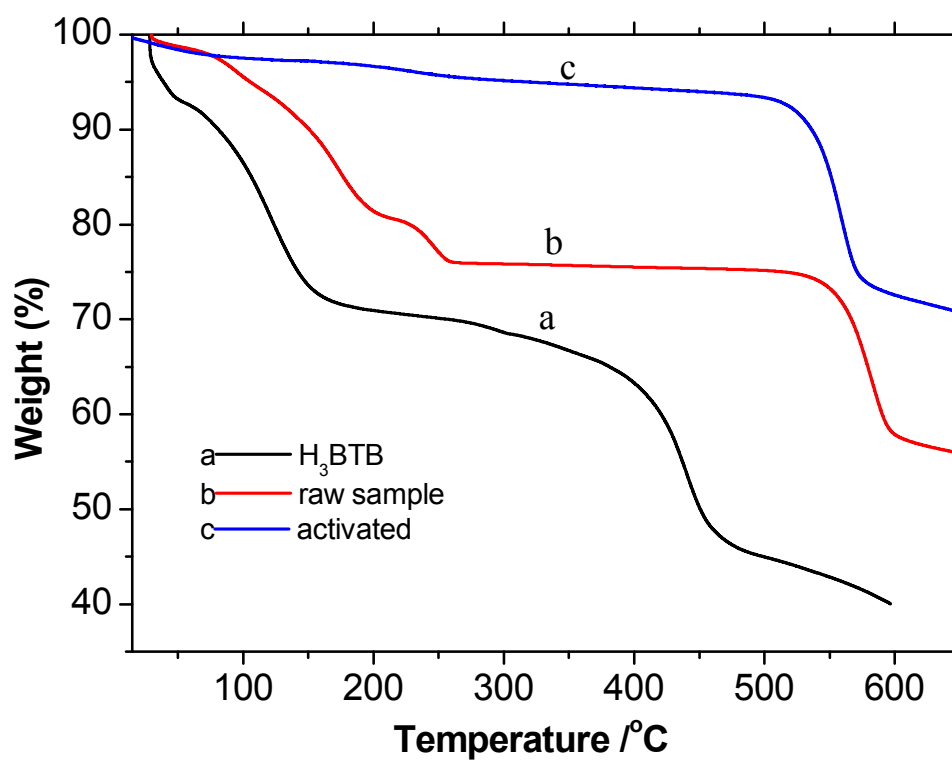

**Figure S2.** TG curves of H<sub>3</sub>BTB, raw sample and activated sample of **Pr-LOF**.

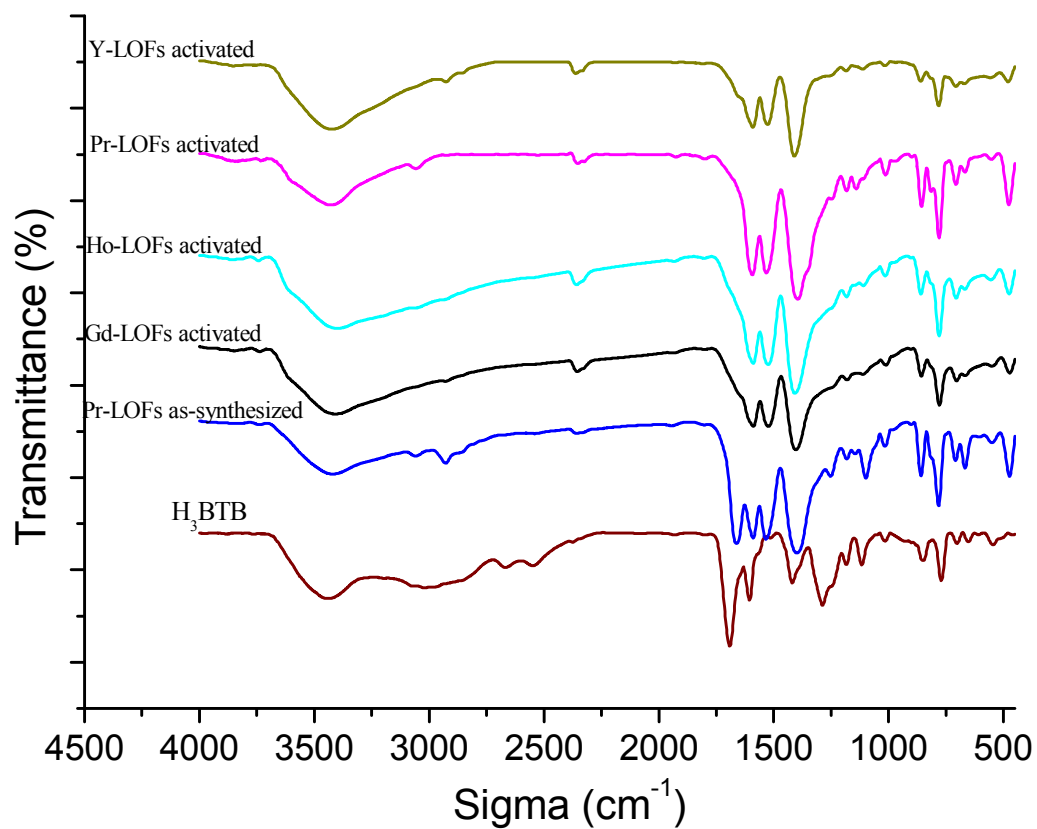

**Figure S3.** FTIR spectra of the as-synthesized and activated LOFs samples.

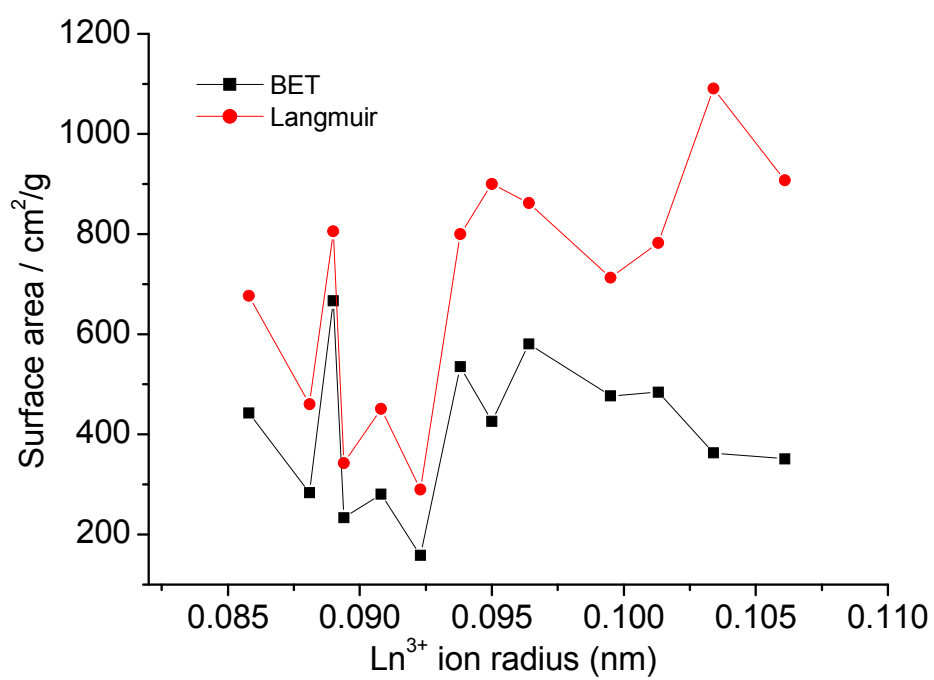

**Figure S4.** Relationship between ion radius and surface area.

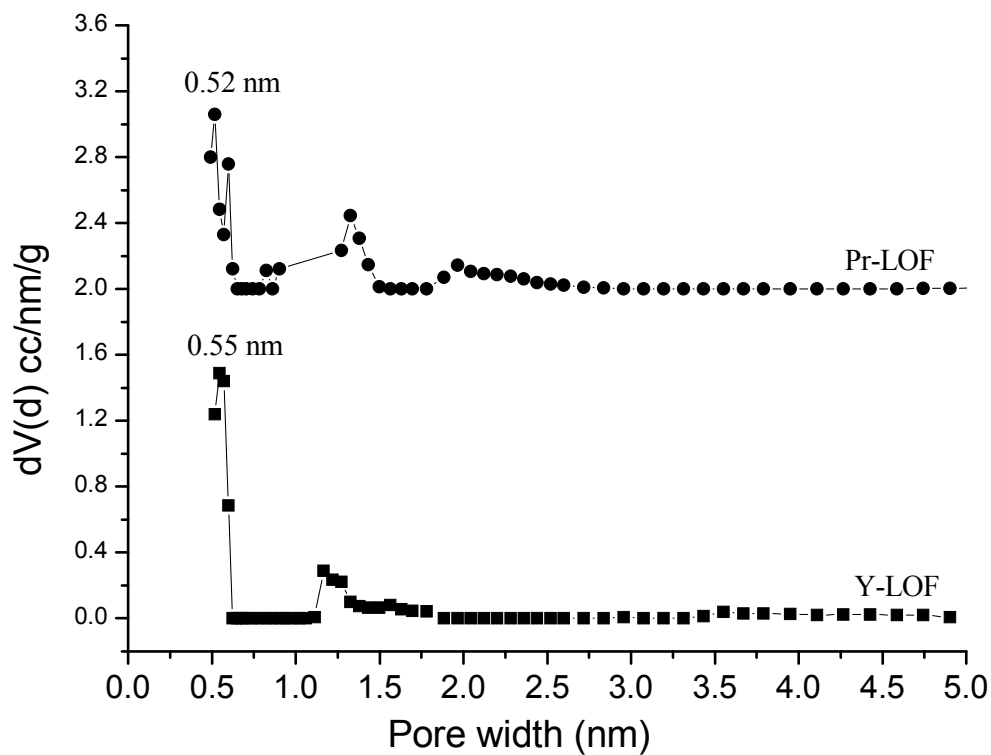

**Figure S5.** Pore size distribution of **Pr-LOF** and **Y-LOF** calculated by DFT method.  
Calc. Model: N<sub>2</sub> at 77 K on carbon (slit/cylinder pore, NLDFT equilibrium model).



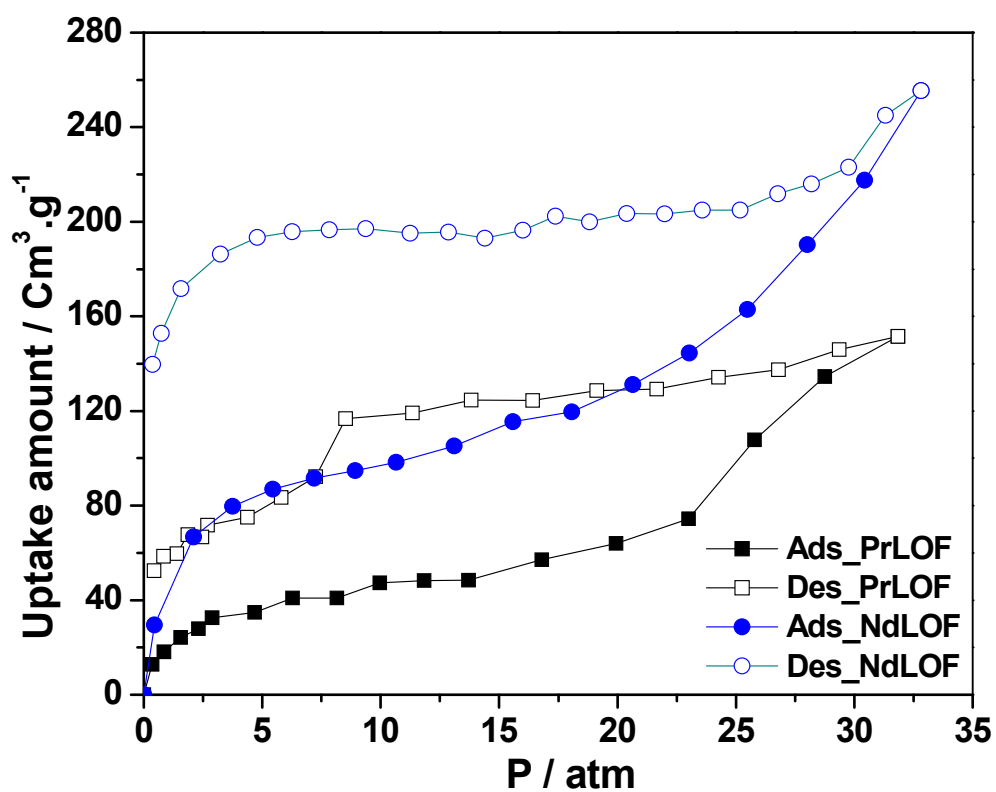

**Figure S6.** High pressure CO<sub>2</sub> adsorption (filled shapes) and desorption (open shapes) isotherms for PrLOF and NdLOF at 273 K.

The selectivity of CO<sub>2</sub>/N<sub>2</sub>, CH<sub>4</sub>/N<sub>2</sub> and CO<sub>2</sub>/CH<sub>4</sub> for **Pr-LOF** were calculated from the Henry constants. The experimental adsorption isotherms were analyzed by using single Langmuir isotherms [Eq (1)].

$$V = \frac{V_1 K_1 P}{1 + K_1 P} \quad (1)$$

$V$ , the total volume adsorbed of gas;  $P$ , the applied pressure;  $V_1$ , calculated adsorbed volume of CH<sub>4</sub>;  $K_1$ , calculated affinity constants;

Fitting of the adsorption branch for CO<sub>2</sub>, CH<sub>4</sub> and N<sub>2</sub> based on the Langmuir isotherm model allowed us to calculate the Henry constants,  $H=K_1 \times V_1$ .

The Henry law selectivity for gas  $i$  over gas  $j$  is then expressed by Equation:

$$S_{i/j} = \frac{H_i}{H_j} \quad (2)$$

The fitting results are showed in Figure S7-S9.

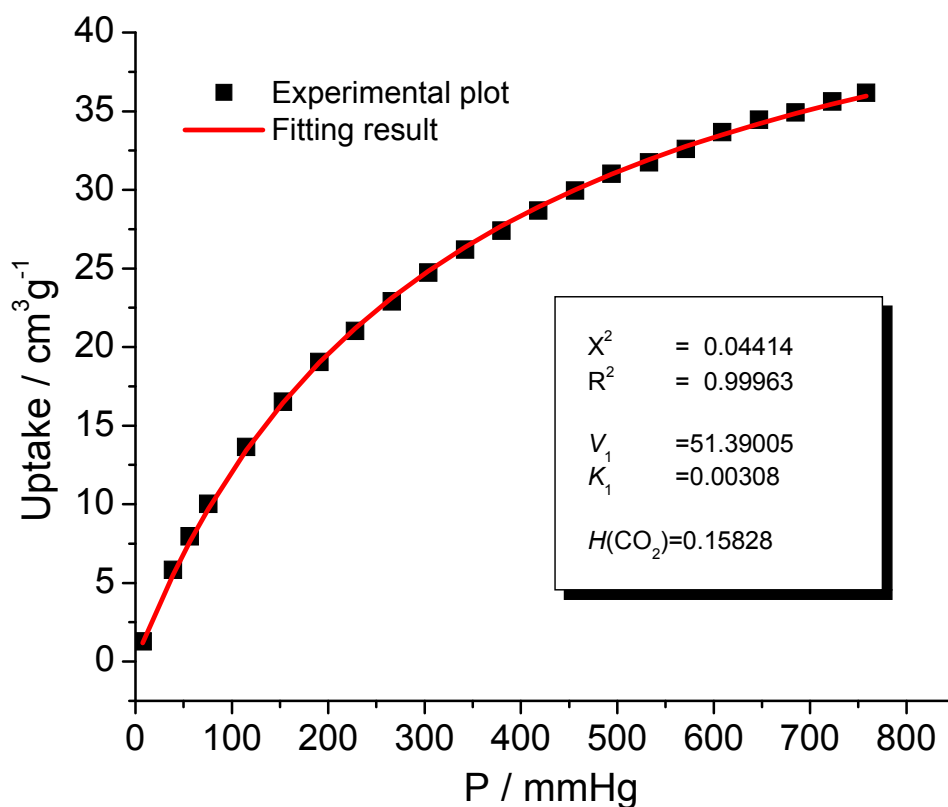

**Figure S7.** CO<sub>2</sub> isotherm adsorption branch of **Pr-LOF** (filled shape) and fitting based on single Langmuir isotherm model (red line).  $V_1$ , calculated adsorbed volume of CO<sub>2</sub>;  $K_1$ , calculated affinity constants;  $X^2$  and  $R^2$ , fitting error;  $H$ , Herry's law constant,  $H(\text{CO}_2)=K_1 \times V_1$  (cm<sup>3</sup>·g<sup>-1</sup>·mmHg<sup>-1</sup>).

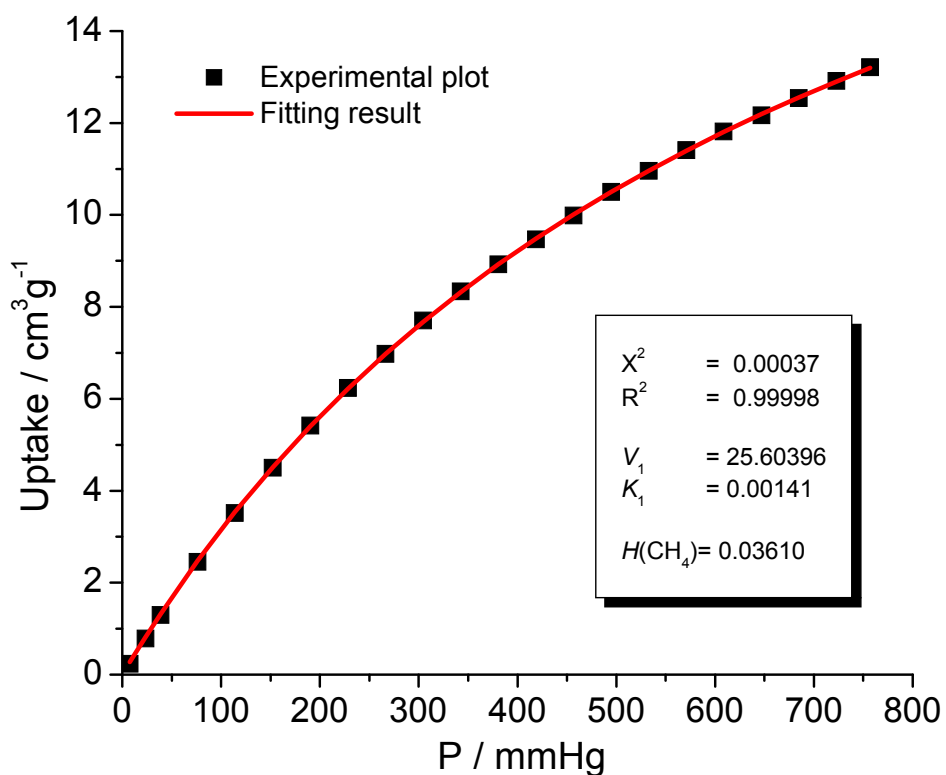

**Figure S8.** CH<sub>4</sub> isotherm adsorption branch of **Pr-LOF** (filled shape) and fitting based on single Langmuir isotherm model (red line).  $V_1$ , calculated adsorbed volume of CH<sub>4</sub>;  $K_1$ , calculated affinity constants;  $X^2$  and  $R^2$ , fitting error;  $H$ , Herry's law constant,  $H(\text{CH}_4)=K_1 \times V_1$  (cm<sup>3</sup>·g<sup>-1</sup>·mmHg<sup>-1</sup>).

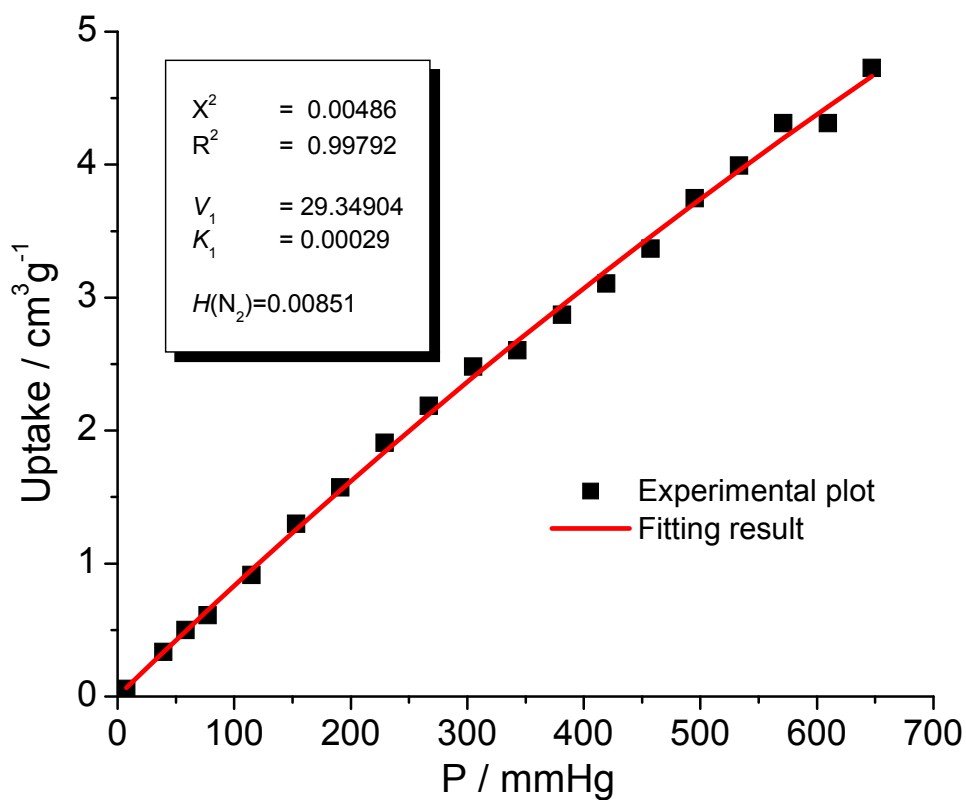

**Figure S9.** N<sub>2</sub> isotherm adsorption branch of Pr-LOF (filled shape) and fitting based on single Langmuir isotherm model (red line).  $V_1$ , calculated adsorbed volume of N<sub>2</sub>;  $K_1$ , calculated affinity constants;  $X^2$  and  $R^2$ , fitting error;  $H$ , Herry's law constant,  $H(N_2)=K_1 \times V_1$  (cm<sup>3</sup>·g<sup>-1</sup>·mmHg<sup>-1</sup>).

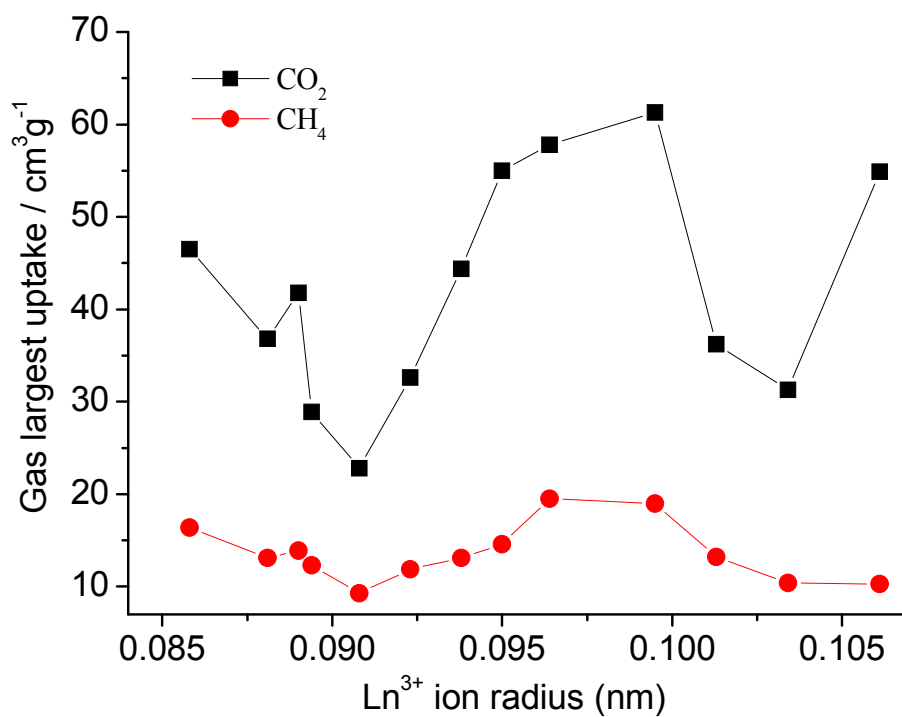

**Figure S10.** Relationship between lanthanide ion radius, and gas uptakes.

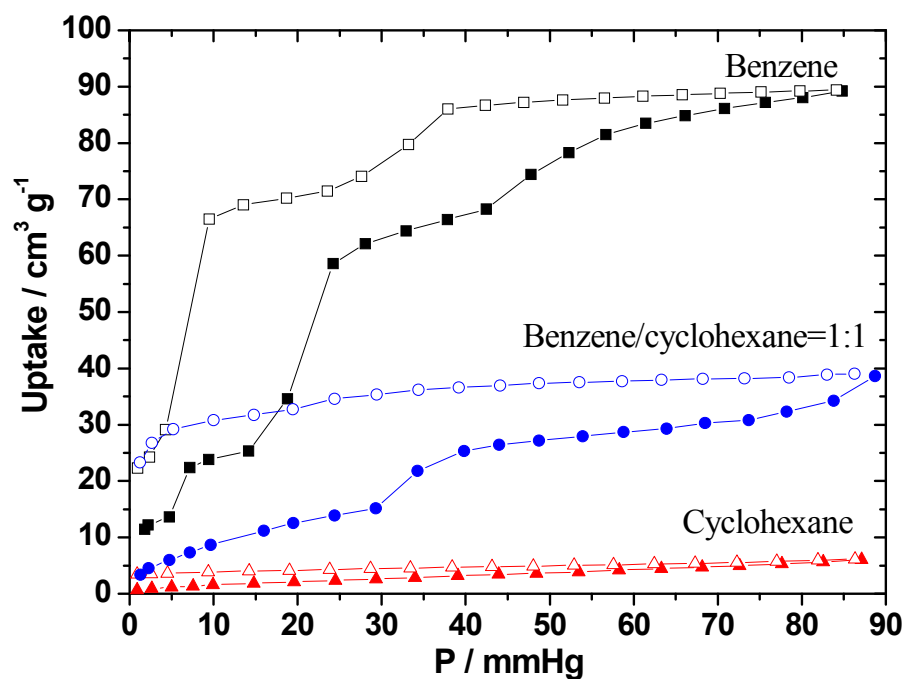

**Figure S11.** Ce-LOF gave the highest selectivity of benzene/cyclohexane adsorption at 298 K. The blue cycle plots show the sorption of benzene/cyclohexane mixture with volume ratio 1:1.

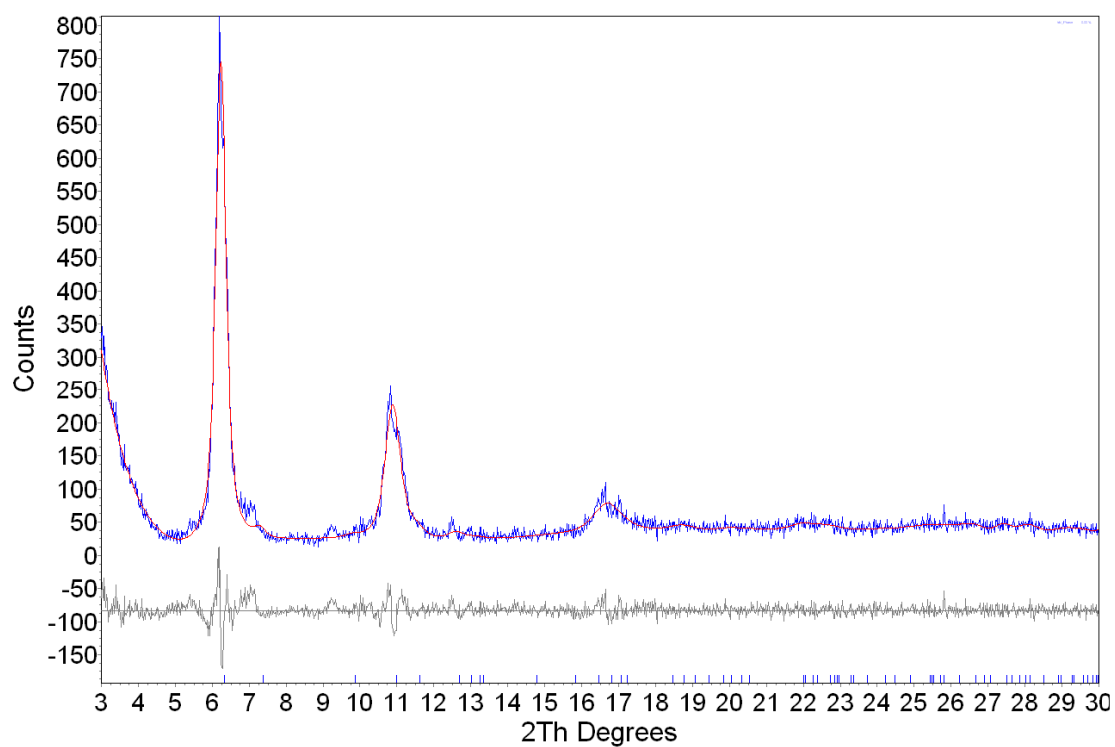

**Figure 12S.** Powder XRD patterns of Nd-LOF indexed by program TOPAS with a hexagonal  $P6_122$  space group ( $a = 16.17(6) \text{ \AA}$ ,  $c = 25.57(13) \text{ \AA}$ ).



**Table S3.** Summary of gas adsorption test results.

| Materials     | Ln <sup>3+</sup> ion<br>radius<br>(pm) | S <sub>BET</sub><br>(m <sup>2</sup> /g) | Pore<br>volume<br>(cm <sup>3</sup> /g) | CO <sub>2</sub><br>uptake<br>(cm <sup>3</sup> /g) | CH <sub>4</sub><br>uptake<br>(cm <sup>3</sup> /g) |
|---------------|----------------------------------------|-----------------------------------------|----------------------------------------|---------------------------------------------------|---------------------------------------------------|
| <b>Y-LOF</b>  | 89                                     | 667                                     | 0.44                                   | 41.8                                              | 13.9                                              |
| <b>La-LOF</b> | 106.1                                  | 351                                     | 0.31                                   | 54.9                                              | 10.3                                              |
| <b>Ce-LOF</b> | 103.4                                  | 363                                     | 0.32                                   | 31.3                                              | 10.4                                              |
| <b>Pr-LOF</b> | 101.3                                  | 484                                     | 0.30                                   | 36.2                                              | 13.2                                              |
| <b>Nd-LOF</b> | 99.5                                   | 477                                     | 0.29                                   | 61.3                                              | 19.0                                              |
| <b>Sm-LOF</b> | 96.4                                   | 581                                     | 0.35                                   | 57.8                                              | 19.5                                              |
| <b>Eu-LOF</b> | 95.0                                   | 426                                     | 0.30                                   | 55.0                                              | 14.6                                              |
| <b>Gd-LOF</b> | 93.8                                   | 535                                     | 0.31                                   | 44.4                                              | 13.1                                              |
| <b>Tb-LOF</b> | 92.3                                   | 158                                     | 0.13                                   | 32.6                                              | 11.9                                              |
| <b>Dy-LOF</b> | 90.8                                   | 281                                     | 0.17                                   | 22.8                                              | 9.3                                               |
| <b>Ho-LOF</b> | 89.4                                   | 233                                     | 0.14                                   | 28.9                                              | 12.3                                              |
| <b>Er-LOF</b> | 88.1                                   | 283                                     | 0.20                                   | 36.8                                              | 13.1                                              |
| <b>Yb-LOF</b> | 85.8                                   | 443                                     | 0.38                                   | 46.5                                              | 16.4                                              |

**Table S4.** CO<sub>2</sub> uptake at 273K and 1 atm of lanthanide-based MOFs.

| Materials                                                                                                                                                                                     | Uptake [cm <sup>3</sup> /g]  | Ref.      |
|-----------------------------------------------------------------------------------------------------------------------------------------------------------------------------------------------|------------------------------|-----------|
| Dy(BTC)(H <sub>2</sub> O)·DMF                                                                                                                                                                 | 189                          | [1]       |
| [Y <sub>2</sub> (TPO) <sub>2</sub> (HCOO)]·(Me <sub>2</sub> NH <sub>2</sub> )·(DMF) <sub>4</sub> ·(H <sub>2</sub> O) <sub>6</sub>                                                             | 66.9                         | [2]       |
| [Eu(L) <sub>4</sub> ] <sup>5-</sup>                                                                                                                                                           | 19.5(P/P <sub>0</sub> =0.03) | [3]       |
| {La(cpia)(2H <sub>2</sub> O) <sub>3</sub> ·4H <sub>2</sub> O} <sub>n</sub>                                                                                                                    | 23 (P/P <sub>0</sub> =0.03)  | [4]       |
| {KHo(C <sub>2</sub> O <sub>4</sub> ) <sub>2</sub> (H <sub>2</sub> O) <sub>4</sub> } <sub>n</sub>                                                                                              | 21.2 (298 K)                 | [5]       |
| (Yb <sub>4</sub> (μ <sub>4</sub> -H <sub>2</sub> O)(C <sub>24</sub> H <sub>12</sub> N <sub>3</sub> O <sub>6</sub> ) <sub>8/3</sub> (SO <sub>4</sub> ) <sub>2</sub> ·3H <sub>2</sub> O·10DMSO) | 220 (195 K)                  | [6]       |
| Gd(TPO)                                                                                                                                                                                       | 285.8 (195 K)                | [7]       |
| Er <sub>2</sub> (TBDC) <sub>3</sub> (phen) <sub>2</sub> 34DMF <sub>3</sub> 2H <sub>2</sub> O                                                                                                  | 51 (195 K)                   | [8]       |
| Nd(BTB)                                                                                                                                                                                       | 61.3                         | This work |

**Table S5.** Benzene and cyclohexane saturate uptake at 298K.

| Materials                                                                                           | Benzene uptake (mg/g) | Cyclohexane uptake (mg/g) | Selectivity <sup>a</sup> |
|-----------------------------------------------------------------------------------------------------|-----------------------|---------------------------|--------------------------|
| <b>La-LOF</b>                                                                                       | 189.7                 | 106.7                     | 1.8                      |
| <b>Ce-LOF</b>                                                                                       | 311.0                 | 22.9                      | 13.6                     |
| <b>Pr-LOF</b>                                                                                       | 288.2                 | 33.4                      | 8.6                      |
| <b>Nd-LOF</b>                                                                                       | 174.7                 | 74.6                      | 2.3                      |
| <b>Sm-LOF</b>                                                                                       | 214.2                 | 155.4                     | 1.4                      |
| <b>Tb-LOF</b>                                                                                       | 88.5                  | 41.6                      | 2.1                      |
| <b>Dy-LOF</b>                                                                                       | 116.0                 | 113.5                     | 1.0                      |
| <b>{[Zn(<math>\mu_4</math>-TCNQ-TCNQ)bpy]<math>\cdot</math>1.5benzene}<sub>n</sub></b> <sup>b</sup> | 80                    | 20                        | 4                        |
| <b>MAF-2</b> <sup>c</sup>                                                                           | 206                   | 9                         | 22.9                     |

<sup>a</sup> Selectivity= Benzene uptake/ Cyclohexane uptake.

<sup>b</sup> Ref. 9.

<sup>c</sup> Ref. 10.

References:

- [1] X. Guo, G. Zhu, Z. Li, F. Sun, Z. Yang and S. Qiu, *Chem. Commun.*, 2006, 3172.
- [2] Z.-J. Lin, Z. Yang, T.-F. Liu, Y.-B. Huang and R. Cao, *Inorg. Chem.*, 2012, **51**, 1813.
- [3] B. D. Chandler, J. O. Yu, D. T. Cramb and G. K. H. Shimizu, *Chem. Mater.*, 2007, **19**, 4467.
- [4] P. Lama, A. Aijaz, S. Neogi, L. J. Barbour and P. K. Bharadwaj, *Cryst. Growth Des.*, 2010, **10**, 3410.
- [5] S. Mohapatra, K. P. S. S. Hembram, U. Waghmare and T. K. Maji, *Chem. Mater.*, 2009, **21**, 5406.
- [6] S. Ma, X.-S. Wang, D. Yuan and H.-C. Zhou, *Angew. Chem. Int. Ed.*, 2008, **47**, 4130.
- [7] W. R. Lee, D. W. Ryu, J. W. Lee, J. H. Yoon, E. K. Koh and C. S. Hong, *Inorg. Chem.*, 2010, **49**, 4723.
- [8] H. He, D. Yuan, H. Ma, D. Sun, G. Zhang and H.-C. Zhou, *Inorg. Chem.*, 2010, **49**, 7605.
- [9] S. Shimomura, S. Horike, R. Matsuda and S. Kitagawa, *J. Am. Chem. Soc.*, 2007, **129**, 10990.
- [10] J.-P. Zhang and X.-M. Chen, *J. Am. Chem. Soc.*, 2008, **130**, 6010.
